# Supplementary material for: Using Electronic Patient Records to Discover Disease Correlations and Stratify Patient Cohorts
Source: PLOS journal article supplement (doi:10.1371/journal.pcbi.1002141), 2011-08-25

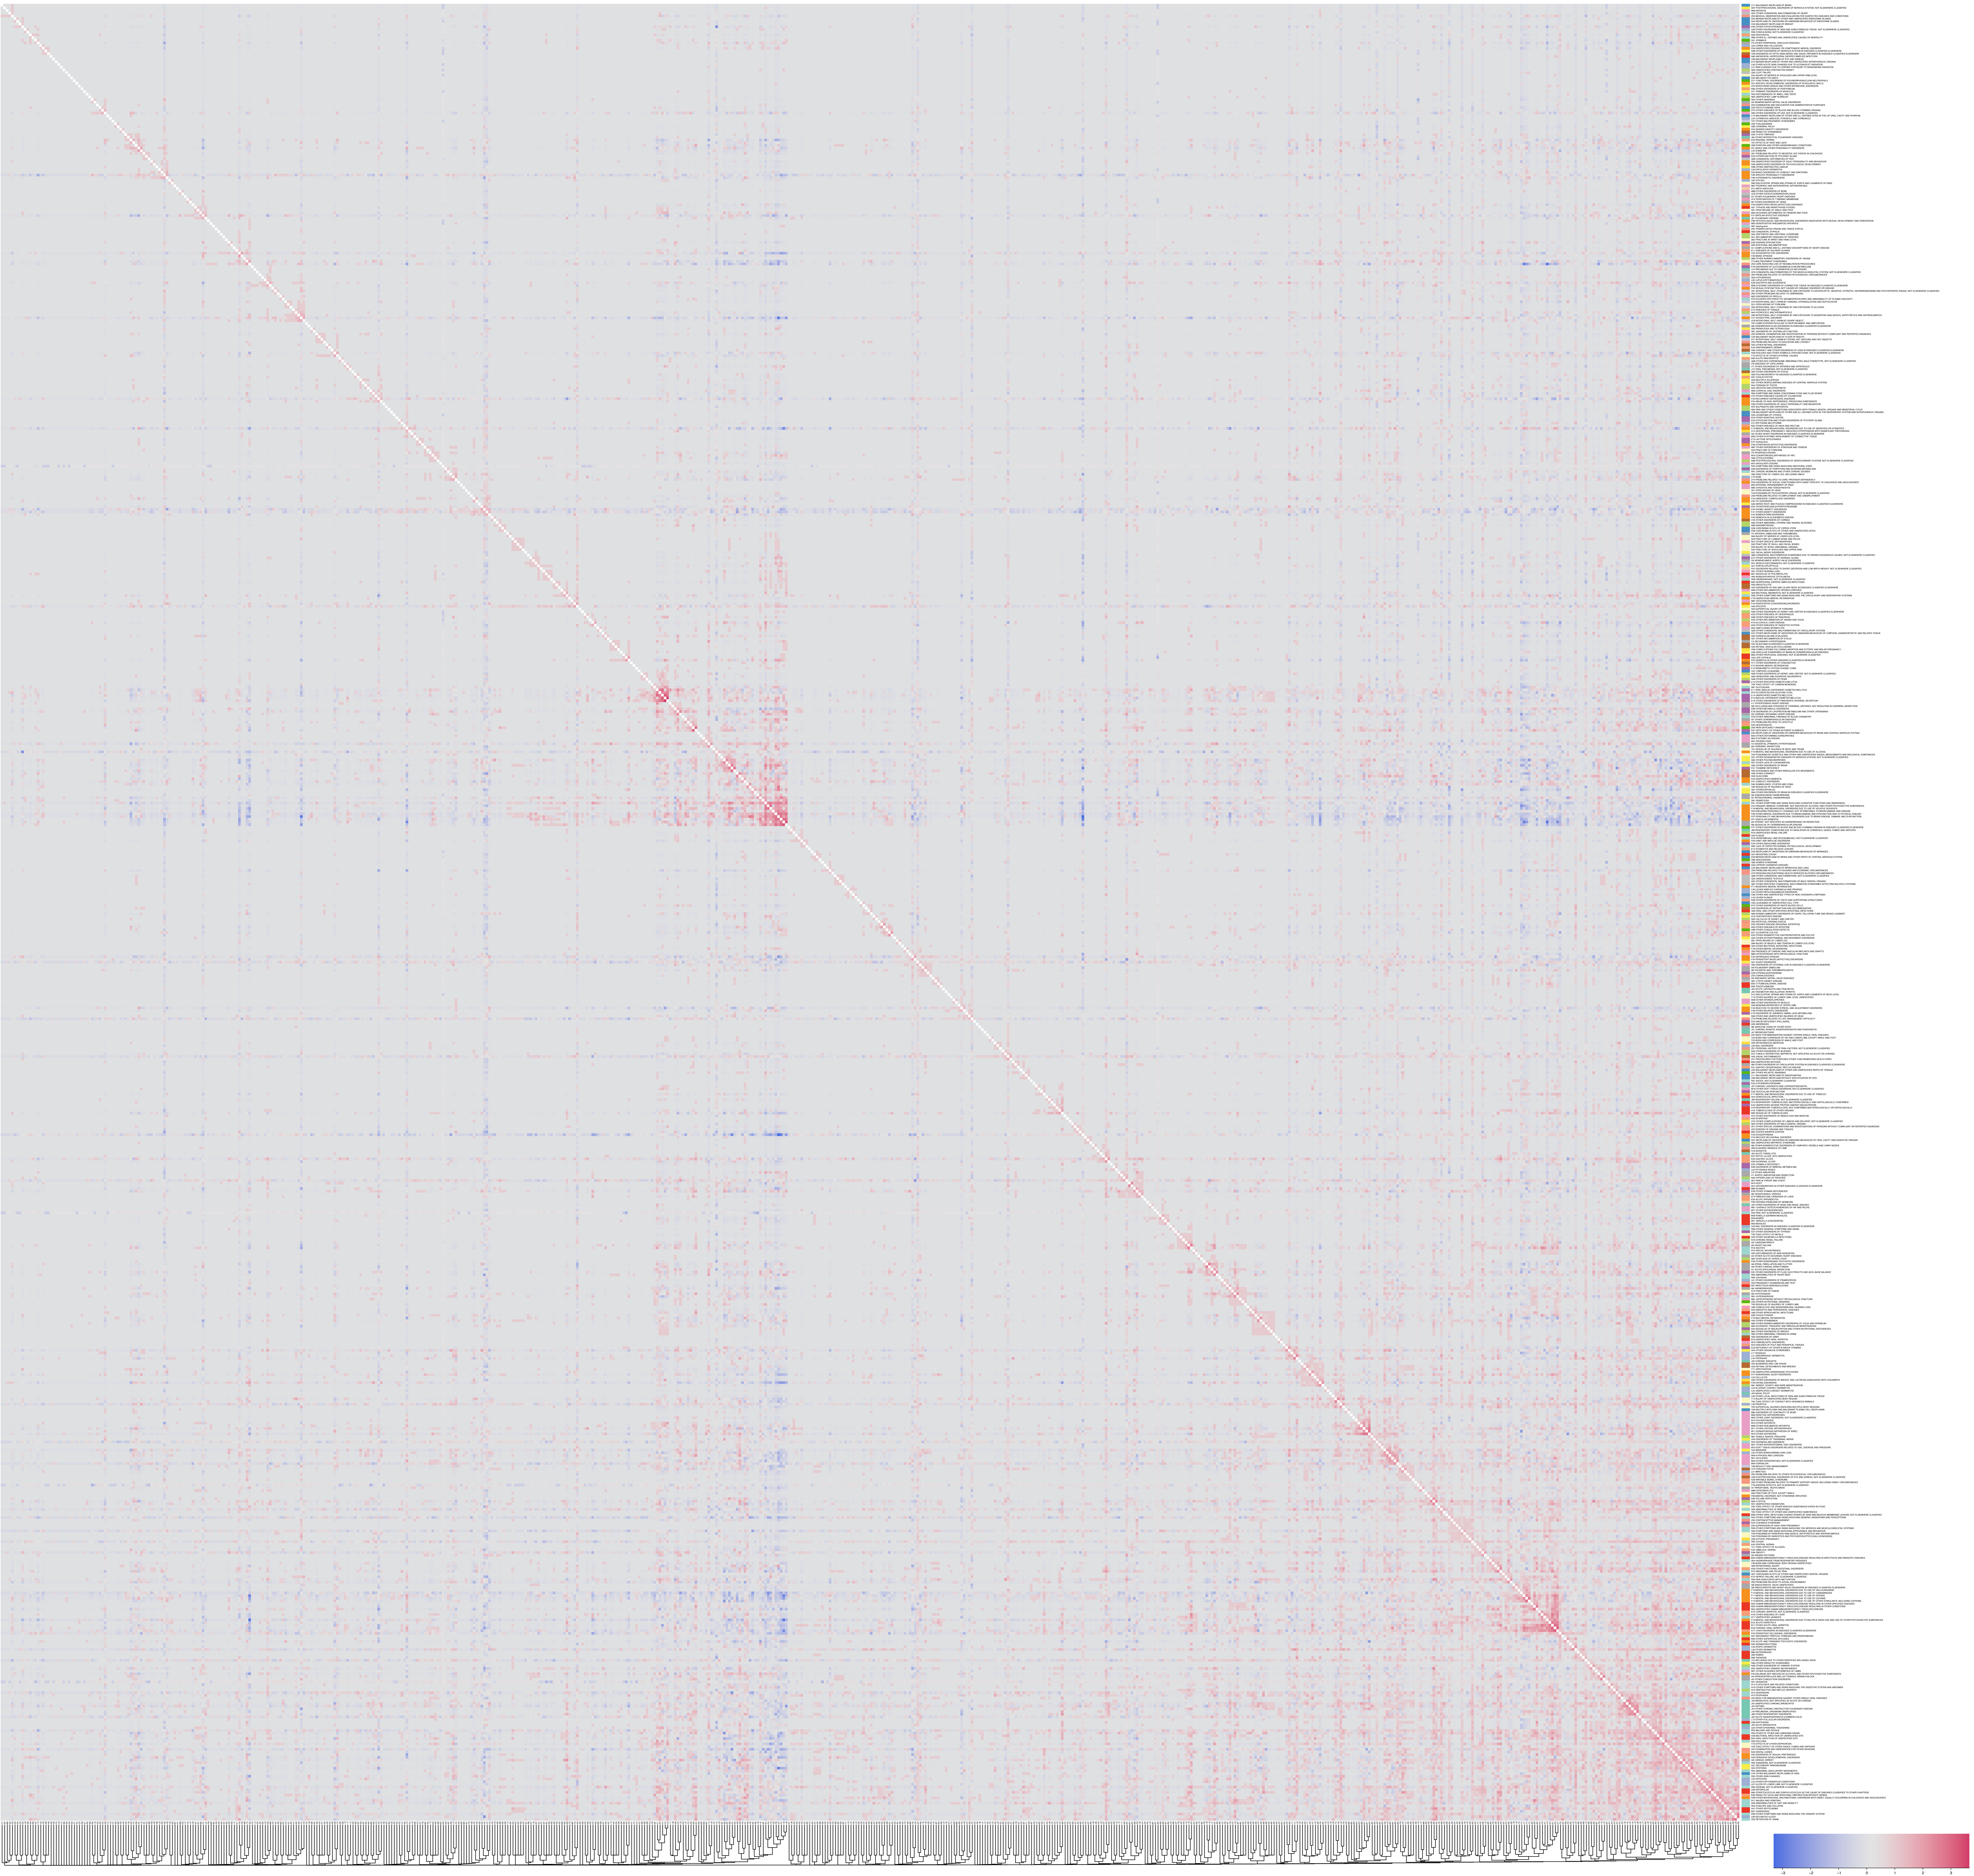



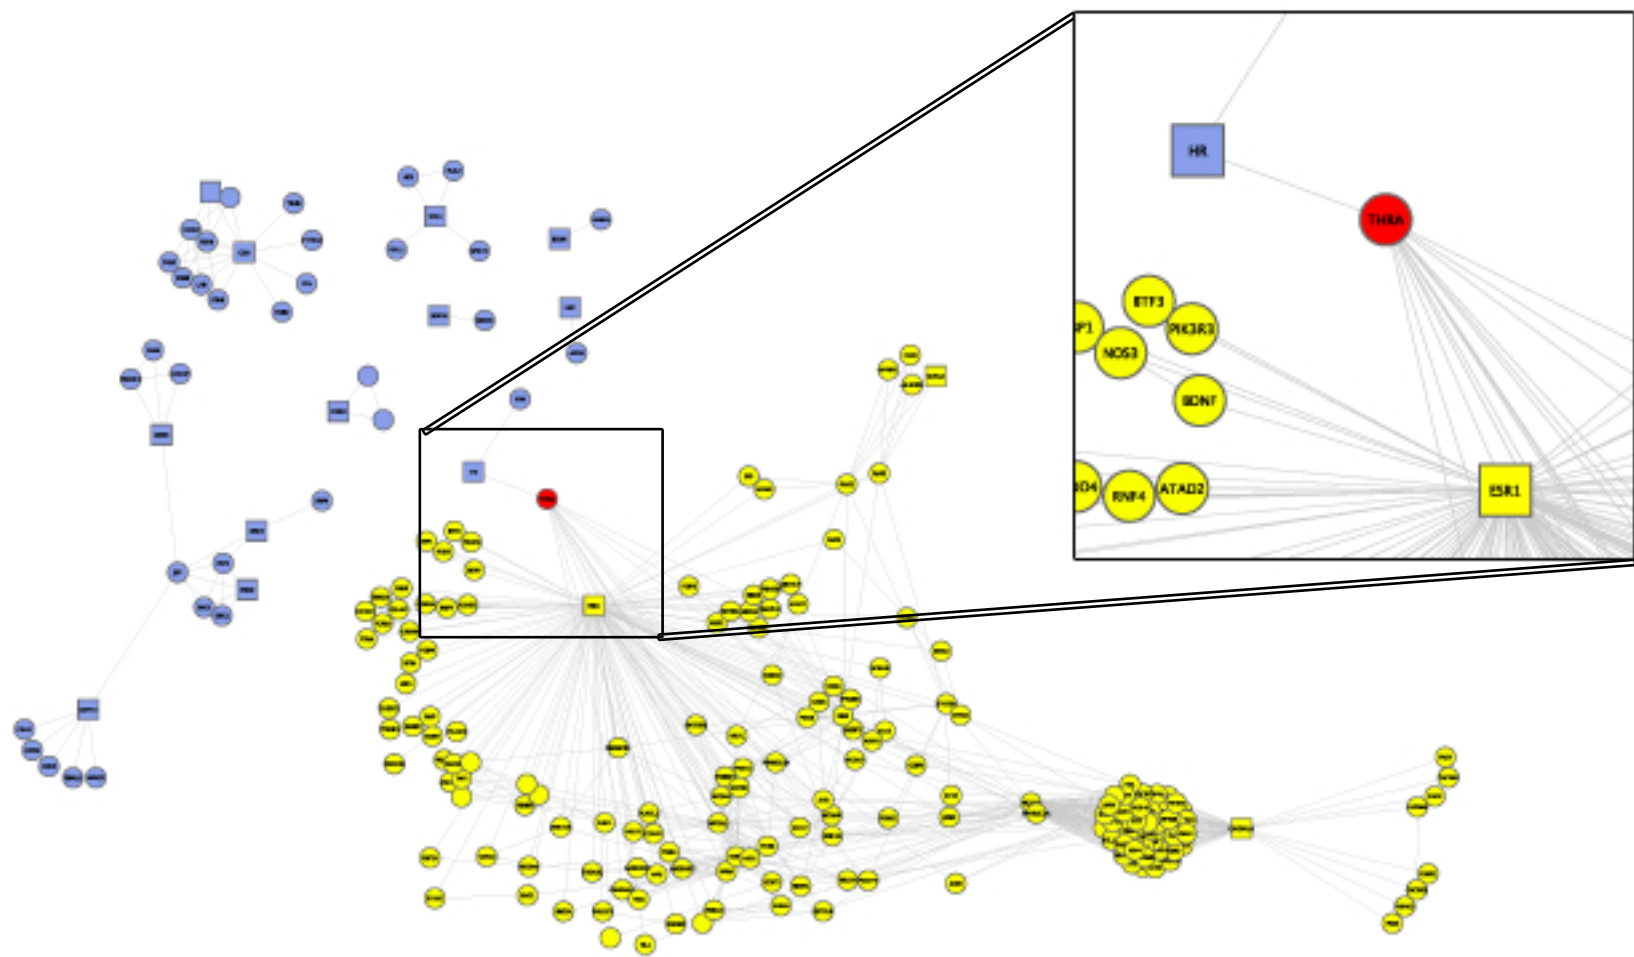

Supplement: S1 (10.1371/journal.pcbi.1002141.s001) [file journal.pcbi.1002141.s001]
